# Supplementary material
Source: ML conference proceedings conference paper supplement (https://openreview.net/forum?id=ohmo21slB3)
Supplement: supplementary_material [file Reproducibility Checklist.pdf › Supplementary Materials/Reproducibility Checklist.pdf]

# Reproducibility Checklist

**Question 1:** Are all datasets used in the study publicly available, and do they involve any access restrictions, licensing requirements, or special procedures for obtaining them?

**All datasets used are publicly available and can be accessed without restrictions.**

**Question 2:** Does the study ensure fully reproducible train/validation/test splits, and how are these splits managed across different datasets?

**All datasets provide official train, validation and test splits, which we follow directly to ensure reproducibility and facilitate result verification.**

**Question 3:** Is the codebase and software environment fully released, including all dependencies and configurations needed for reproduction?

**The complete codebase is publicly available, specifying all dependencies.**

**Question 4:** Are all training hyperparameters fully documented, including those for optimization, scheduling, and number of epochs?

**The hyperparameters, including batch size, learning rate, optimizer, scheduler, and number of epochs, are documented in the supplementary materials.**

**Question 5:** Are all baseline comparisons conducted fairly and consistently, using the same data splits, training protocols, and evaluation metrics?

**All baselines are reproduced following official implementations or original papers with consistent splits, training, and evaluation settings.**

**Question 6:** Are the experimental results stable and reproducible across multiple runs with different random seeds?

**All experiments are repeated 3 times with different random seeds. Final results are reported as the mean  $\pm$  standard deviation.**

**Question 7:** Are the hardware and computational resources fully specified, including GPUs, memory, and environment details?

**We provide the experimental setup, memory details, and computational environment used for training and evaluation to ensure reproducibility.**

**Question 8:** Are all evaluation metrics, calculation procedures, and experimental protocols fully specified to ensure fair and reproducible comparisons across baselines and models?

**The evaluation metrics, calculation methods, and protocols are explicitly described to allow fair comparison with baselines.**
